# Supplementary material
Source: PubMed Central journal article supplement (PMC4197789)
Supplement: CJP-2014-vol59-October-548-555-eAppendixAandB.pdf [file CJP-2014-vol59-October-548-555-eAppendixAandB.pdf]

Préville M, Lamoureux-Lamarche C, Vasiliadis H-M. The 6-month prevalence of posttraumatic stress syndrome (PTSS) among older adults: validity and reliability of the PTSS scale. Can J Psychiatry. 2014;59(10):548–555.

#### Appendix A

##### PTSD reference chart

---

In the course of your life, have you ever experienced one of the following events?

- 1 Have you ever gone to a place where there was a war, a revolution, a military coup or a military invasion?
  - 2 Have you ever seen atrocities or massacres such as mutilated bodies or mass killings?
  - 3 Have you ever been a refugee, meaning have you ever ran away from your country to avoid a danger or a persecution?
  - 4 Has a person near you or yourself ever been kidnapped or kept in captivity?
  - 5 Have you ever been exposed to a toxic chemical product or a substance that could have caused you a serious injury?
  - 6 Has a person near you or yourself been involved in a car accident or other type of potentially deadly accident (ex: at work) ?
  - 7 Has a person near you or yourself ever been caught in a natural disaster such as a flood, hurricane or earthquake or in a fire or a bomb explosion?
  - 8 Have you ever had an illness or a potentially deadly disease?
  - 9 Has a person near you ever had an illness or a potentially deadly disease?
  - 10 In your childhood, have you ever been beaten by your parents or your guardians or been witness to physical violence?
  - 11 Have you ever been the victim of an armed robbery or been threatened with a weapon?
  - 12 Has a person near you or yourself ever been victim of a sexual abuse?
  - 13 Did someone ever stalk you, meaning that a person would have followed you or watched your activities in a way that you felt seriously in danger?
  - 14 Have you ever been the victim of violence, abuse or negligence from your spouse, one of your children or a person near you?
-

---

Appendix A: List of difficulties that people might feel after a stressful event

---

Think about the event that you have reported or the most important one if you have reported more than one event and indicate if this event was associated with the following reactions in the past 6 months.

- 1 Every reminder of the event brought back my feelings about the event
  - 2 I woke up at night
  - 3 Different things made me think about the event
  - 4 I felt irritable and angry
  - 5 When I thought about it or someone reminded me of it, I avoided letting myself become overwhelmed
  - 6 Without wanting to, I rethought about the event
  - 7 I had the impression that the event had never happened or that it was not real
  - 8 Images about the event appeared in my head
  - 9 I stayed far away from what made me think about it
  - 10 I was nervous and I jumped easily
  - 11 I was trying to not think about the event
  - 12 I was aware that I had still a lot of emotions about the event, but I did not face it
  - 13 My feelings about the event were frozen
  - 14 I was feeling and reacting as if I still was at the event
  - 15 I had difficulties trying to fall asleep
  - 16 I felt waves of intense emotions about the event
  - 17 I had problems concentrating
  - 18 I tried to erase it from my memory
  - 19 What reminded me of the event caused physical reactions such as sweating, difficulty breathing, nausea or palpitations
  - 20 I dreamed about the event
  - 21 I was on the edge and would not let my guard down
  - 22 I tried not to talk about it
-

FREQUENCIES OF PEOPLE REPORTING IMPACT ON FUNCTIONING (ISF) FOR PTS-S SYMPTOMS

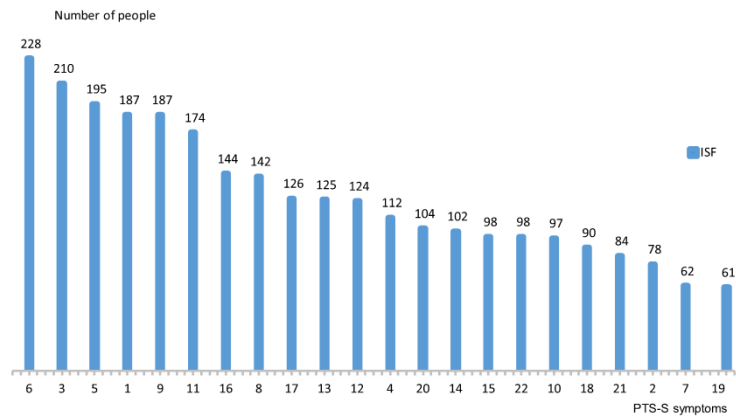

- 1 Every reminder of the event brought back my feelings about the event
- 2 I wake up at night
- 3 Different things made me think about the event
- 4 I felt irritable and angry
- 5 When I thought about it or someone reminded me of it, I avoided telling myself I became overwhelmed
- 6 Without wanting to, I still thought about the event
- 7 I had the impression that the event had never happened or that it was not real
- 8 Images about the event appeared in my head
- 9 I stayed far away from what made me think about it
- 10 I was nervous and I jumped easily
- 11 I was trying to not think about the event
- 12 I was aware that I had still a lot of emotions about the event, but I did not face it
- 13 My feelings about the event were frozen
- 14 I was feeling and reacting as if I still was at the event
- 15 I had difficulties trying to fall asleep
- 16 I felt waves of intense emotions about the event
- 17 I had problems concentrating
- 18 I tried to erase it from my memory
- 19 What reminded me of the event caused physical reactions such as sweating, difficulty breathing, nausea or palpitations
- 20 I dreamed about the event
- 21 I was on the edge and would not let my guard down
- 22 I tried not to talk about it
